# Supplementary material for: Live attenuated Salmonella typhimurium vaccines delivering SaEsxA and SaEsxB via type III secretion system confer protection against Staphylococcus aureus infection
Source: BMC Infect Dis. 2018 Apr 25;18:195. doi: 10.1186/s12879-018-3104-y (PMC5921394; doi:10.1186/s12879-018-3104-y)
Supplement: Supplementary file 1 — Table S1. Evaluation of humoral and mucosal immune responses against rSaEsxA and rSaEsxB by ELISA. Readout at OD450 was shown. (XLSX 49 kb) [file 12879_2018_3104_MOESM1_ESM.xlsx]

## Sheet: Additional Table 1A
Additional Table 1A. Antigen-specific IgG1 and IgG2a. Readout at OD450 was shown.
SaEsxA-specific IgG1
antibody titer	4050	4050	12150	12150	36450	36450	109350	109350
N106-1	0.041	0.044	0.042	0.041	0.04	0.041	0.04	0.039
N106-2	0.042	0.043	0.041	0.041	0.042	0.04	0.042	0.039
N106-3	0.045	0.046	0.041	0.042	0.039	0.04	0.041	0.05
N106-4	0.042	0.045	0.04	0.041	0.044	0.04	0.041	0.041
N106-5	0.046	0.05	0.039	0.043	0.041	0.043	0.041	0.039
N106-6	0.054	0.053	0.055	0.046	0.042	0.042	0.044	0.04
N106-7	0.062	0.059	0.048	0.046	0.047	0.046	0.043	0.041
N106-8	0.06	0.064	0.051	0.046	0.044	0.042	0.04	0.041
N19-1	0.099	0.098	0.055	0.053	0.05	0.048	0.047	0.044
N19-2	1.337	1.32	0.151	0.15	0.078	0.075	0.053	0.051
N19-3	0.393	0.378	0.447	0.44	0.169	0.166	0.08	0.078
N19-4	0.288	0.28	0.165	0.161	0.076	0.078	0.065	0.061
N19-5	0.166	0.162	0.071	0.07	0.047	0.049	0.047	0.044
N19-6	0.698	0.71	0.408	0.412	0.151	0.16	0.081	0.08
N19-7	0.268	0.263	0.15	0.145	0.082	0.08	0.054	0.058
N19-8	0.304	0.302	0.146	0.143	0.076	0.071	0.055	0.057
There are 8 mice in N106 group and N19 group, respectively. Diluted sera were added into the ELISA plates in duplicate.
SaEsxA-specific IgG2a
antibody titer	4050	4050	12150	12150	36450	36450	109350	109350
N106-1	0.047	0.049	0.047	0.046	0.042	0.043	0.04	0.038
N106-2	0.04	0.043	0.044	0.042	0.039	0.039	0.039	0.039
N106-3	0.048	0.052	0.048	0.047	0.044	0.045	0.038	0.038
N106-4	0.05	0.047	0.048	0.046	0.046	0.044	0.04	0.039
N106-5	0.043	0.049	0.044	0.042	0.039	0.04	0.043	0.041
N106-6	0.055	0.058	0.045	0.046	0.038	0.04	0.039	0.039
N106-7	0.057	0.061	0.054	0.055	0.049	0.048	0.041	0.044
N106-8	0.054	0.055	0.048	0.048	0.04	0.043	0.042	0.038
N19-1	0.208	0.213	0.099	0.094	0.061	0.062	0.049	0.048
N19-2	0.355	0.362	0.217	0.206	0.8	0.082	0.058	0.055
N19-3	0.151	0.161	0.073	0.072	0.048	0.047	0.042	0.039
N19-4	0.518	0.515	0.213	0.21	0.093	0.091	0.055	0.05
N19-5	0.304	0.301	0.113	0.112	0.061	0.062	0.044	0.043
N19-6	0.139	0.143	0.077	0.076	0.043	0.044	0.041	0.039
N19-7	0.532	0.534	0.213	0.21	0.081	0.082	0.059	0.058
N19-8	0.559	0.561	0.245	0.021	0.096	0.092	0.062	0.064
There are 8 mice in N106 group and N19 group, respectively. Diluted sera were added into the ELISA plates in duplicate.
SaEsxB-specific IgG1
antibody titer	4050	4050	12150	12150	36450	36450	109350	109350
N106-1	0.054	0.055	0.049	0.051	0.048	0.046	0.049	0.046
N106-2	0.053	0.054	0.048	0.049	0.048	0.048	0.047	0.046
N106-3	0.055	0.056	0.051	0.05	0.047	0.048	0.043	0.044
N106-4	0.054	0.057	0.052	0.05	0.049	0.049	0.049	0.047
N106-5	0.059	0.062	0.055	0.057	0.05	0.052	0.047	0.046
N106-6	0.061	0.062	0.053	0.055	0.048	0.045	0.045	0.044
N106-7	0.053	0.059	0.047	0.048	0.047	0.045	0.049	0.046
N106-8	0.055	0.058	0.049	0.048	0.05	0.047	0.047	0.047
N20-1	0.388	0.39	0.295	0.3	0.125	0.124	0.078	0.075
N20-2	1.58	1.44	0.707	0.703	0.276	0.27	0.121	0.124
N20-3	0.622	0.612	0.4	0.034	0.153	0.156	0.078	0.073
N20-4	0.127	0.125	0.064	0.067	0.052	0.054	0.046	0.048
N20-5	0.172	0.18	0.097	0.103	0.074	0.065	0.057	0.058
N20-6	0.681	0.67	0.252	0.255	0.11	0.114	0.076	0.077
N20-7	0.568	0.559	0.2	0.221	0.115	0.12	0.062	0.061
N20-8	0.411	0.42	0.183	0.184	0.091	0.095	0.064	0.063
There are 8 mice in N106 group and N20 group, respectively. Diluted sera were added into the ELISA plates in duplicate.
SaEsxB-specific IgG2a
antibody titer	4050	4050	12150	12150	36450	36450	109350	109350
N106-1	0.074	0.07	0.062	0.06	0.047	0.046	0.49	0.048
N106-2	0.092	0.088	0.069	0.069	0.054	0.053	0.051	0.049
N106-3	0.057	0.053	0.05	0.054	0.049	0.05	0.043	0.045
N106-4	0.115	0.11	0.067	0.065	0.055	0.054	0.051	0.049
N106-5	0.079	0.078	0.069	0.065	0.054	0.056	0.048	0.048
N106-6	0.057	0.056	0.053	0.055	0.055	0.057	0.047	0.044
N106-7	0.076	0.078	0.055	0.054	0.051	0.05	0.044	0.045
N106-8	0.059	0.056	0.047	0.049	0.049	0.048	0.043	0.042
N20-1	0.22	0.225	0.124	0.122	0.07	0.073	0.053	0.05
N20-2	0.389	0.393	0.274	0.273	0.119	0.117	0.065	0.061
N20-3	0.253	0.258	0.165	0.161	0.083	0.08	0.055	0.051
N20-4	0.156	0.15	0.067	0.077	0.052	0.047	0.042	0.045
N20-5	0.222	0.213	0.132	0.128	0.073	0.069	0.042	0.043
N20-6	0.243	0.247	0.122	0.125	0.068	0.065	0.047	0.049
N20-7	0.244	0.241	0.132	0.123	0.075	0.073	0.045	0.044
N20-8	0.184	0.157	0.125	0.124	0.101	0.095	0.05	0.054
There are 8 mice in N106 group and N20 group, respectively. Diluted sera were added into the ELISA plates in duplicate.

## Sheet: Additional Table 1B
Additional Table 1B. Antigen-specific sIgA in feces. Readout at OD450 was shown.
SaEsxA-specific sIgA
antibody titer	1	1	2	2	4	4	8	8	16	16	32	32
N106-1	0.189	0.193	0.059	0.055	0.05	0.053	0.049	0.05	0.045	0.05	0.046	0.049
N106-2	0.078	0.078	0.059	0.057	0.064	0.061	0.051	0.052	0.05	0.049	0.05	0.049
N106-3	0.096	0.099	0.056	0.054	0.045	0.051	0.053	0.052	0.051	0.053	0.052	0.05
N106-4	0.241	0.229	0.054	0.054	0.058	0.055	0.061	0.058	0.056	0.053	0.052	0.051
N106-5	0.168	0.164	0.063	0.069	0.055	0.053	0.057	0.054	0.053	0.05	0.051	0.047
N19-1	0.371	0.366	0.4	0.378	0.244	0.24	0.15	0.155	0.101	0.099	0.079	0.077
N19-2	0.243	0.238	0.211	0.203	0.207	0.201	0.176	0.164	0.119	0.11	0.084	0.081
N19-3	0.666	0.662	0.197	0.195	0.138	0.134	0.084	0.08	0.071	0.067	0.064	0.06
N19-4	0.067	0.061	0.068	0.065	0.061	0.063	0.051	0.049	0.046	0.051	0.047	0.048
N19-5	0.225	0.241	0.213	0.21	0.188	0.192	0.124	0.118	0.076	0.079	0.066	0.07
There are 5 mice in N106 group and 5 mice in N19 group. Diluted sera were added into the ELISA plates in duplicate.
SaEsxB-specific sIgA
antibody titer	1	1	2	2	4	4	8	8
N106-1	0.174	0.17	0.082	0.08	0.071	0.067	0.062	0.061
N106-2	0.156	0.153	0.086	0.084	0.066	0.066	0.063	0.061
N106-3	0.092	0.091	0.064	0.063	0.052	0.05	0.051	0.049
N106-4	0.155	0.155	0.132	0.13	0.071	0.07	0.075	0.072
N106-5	0.253	0.254	0.08	0.081	0.061	0.062	0.055	0.053
N20-1	0.113	0.112	0.056	0.055	0.056	0.055	0.051	0.051
N20-2	0.198	0.193	0.057	0.057	0.051	0.049	0.049	0.048
N20-3	0.1	0.106	0.056	0.055	0.055	0.057	0.053	0.05
N20-4	0.077	0.079	0.054	0.055	0.052	0.054	0.049	0.045
N20-5	0.082	0.082	0.059	0.055	0.058	0.054	0.053	0.05
N20-6	0.061	0.06	0.05	0.048	0.046	0.05	0.044	0.044
N20-7	0.153	0.152	0.042	0.042	0.041	0.043	0.042	0.044
N20-8	0.08	0.083	0.071	0.07	0.056	0.057	0.049	0.047
N20-9	0.141	0.14	0.045	0.044	0.045	0.048	0.046	0.046
N20-10	0.164	0.162	0.145	0.144	0.13	0.129	0.096	0.094
There are 5 mice in N106 group and 10 mice in N20 group. Diluted sera were added into the ELISA plates in duplicate.
