# Supplementary material for: Live attenuated Salmonella typhimurium vaccines delivering SaEsxA and SaEsxB via type III secretion system confer protection against Staphylococcus aureus infection
Source: BMC Infect Dis. 2018 Apr 25;18:195. doi: 10.1186/s12879-018-3104-y (PMC5921394; doi:10.1186/s12879-018-3104-y)
Supplement: Supplementary file 2 — Table S2. Evaluation of cellular immune response against rSaEsxA and rSaEsxB by ELISPOT. The spot-forming cells were counted using an immunospot reader system. The spot numbers were shown. (XLSX 41 kb) [file 12879_2018_3104_MOESM2_ESM.xlsx]

## Sheet: Additional Table 2A
Additional Table 2A. IFN-gamma ELISPOT against rSaEsxA
	Naïve	N106	N19
Mouse #1	3	20	274
Mouse #1	0	8	201
Mouse #2	9	75	146
Mouse #2	13	47	128
Mouse #3	9	125	269
Mouse #3	17	111	155

## Sheet: Additional Table 2B
Additional Table 2B. IL-17A ELISPOT against rSaEsxA
	PBS	N106	N19
Mouse #1	2	2	16
Mouse #1	1	2	18
Mouse #2	3	110	75
Mouse #2	1	101	67
Mouse #3	5	20	32
Mouse #3	3	29	33
Mouse #4	2	7	24
Mouse #4	3	9	28
There are four mice in each group. For each mice, splenocytes were plated in duplicate. The spot value of one mice in naïve group was abnormal, and discarded (grey shade).

## Sheet: Additional Table 2C
Additional Table 2C. IFN-gamma ELISPOT against rSaEsxB
	PBS	N106	N20
Mouse #1	65	65	443
Mouse #1	23	29	611
Mouse #2	41	636	544
Mouse #2	30	665	571
Mouse #3	75	297	647
Mouse #3	60	383	604
Mouse #4	33	81	457
Mouse #4	34	185	751
There are four mice in each group. For each mice, splenocytes were plated in duplicate. The spot value of one mice in naïve group was abnormal, and discarded (grey shade).
																												2

## Sheet: Additional Table 2D
Additional Table 2D. IL-17A ELISPOT against rSaEsxB
	PBS	N106	N20
Mouse #1	89	142	200
Mouse #1	81	76	275
Mouse #2	64	295	195
Mouse #2	66	321	254
Mouse #3	41	92	616
Mouse #3	89	134	507
Mouse #4	62	141	272
Mouse #4	82	108	194
There are four mice in each group. For each mice, splenocytes were plated in duplicate. The spot value of one mice in naïve group was abnormal, and discarded (grey shade).
