# Supplementary material for: Live attenuated Salmonella typhimurium vaccines delivering SaEsxA and SaEsxB via type III secretion system confer protection against Staphylococcus aureus infection
Source: BMC Infect Dis. 2018 Apr 25;18:195. doi: 10.1186/s12879-018-3104-y (PMC5921394; doi:10.1186/s12879-018-3104-y)
Supplement: Supplementary file 3 — Table S3. Survival curves of vaccinated mice after lethal challenge with two clinical S. aureus strains. Mouse numbers were shown after challenge with S. aureus strains. (XLSX 35 kb) [file 12879_2018_3104_MOESM3_ESM.xlsx]

## Sheet: Additional Table 3A
Additional Table 3A. Survival curves of vaccinated BALB/c mice after lethal challenge with S. aureus strain USA 300. Mouse numbers were shown after chanllenge.
USA 300	mouse number
days post infection	N106	N19	N20
0	9	9	9
1	9	9	9
2	9	9	9
3	8	7	9
4	6	7	8
5	5	6	8
6	2	6	5
7	2	5	5
8	1	4	5
9	0	3	5
10	0	3	5
11	0	2	5
12	0	2	5
13	0	2	4
14	0	2	4

## Sheet: Additional Table 3B
Additional Table 3B. Survival curves of vaccinated BALB/c mice after lethal challenge with S. aureus strain Newman. Mouse numbers were shown after chanllenge.
Newman	mouse number
days post infection	N106	N19
0	8	8
1	7	8
2	4	8
3	2	8
4	2	8
5	2	6
6	1	3
7	0	1
8	0	1
9	0	0
10	0	0

## Sheet: Additional Table 3C
Additional Table 3C. Survival curves of vaccinated BALB/c mice after lethal challenge with S. aureus strain Newman. Mouse numbers were shown after chanllenge.
Newman	mouse number
days post infection	N106	N20
0	9	9
1	9	9
2	8	8
3	6	7
4	4	6
5	3	5
6	0	4
7	0	3
8	0	3
9	0	1
10	0	0
